# Supplementary material for: Y-chromosomal haplotyping of single sperm cells isolated from semen mixtures – a successful identification of three perpetrators in a multi-suspect sexual assault case
Source: PubMed Central journal article supplement (PMC4228287; doi:10.3325/cmj.2014.55.537), 2014-10
Supplement: CroatMedJ_55_s003.pdf [file CroatMedJ_55_s003.pdf]

Supplementary Table 1. Genotypes of single source semen sample amplified using a Yfiler® kit.

|           | 1     | 2     | 3     | 4     | 5     | Consensus profile | Known profile |
|-----------|-------|-------|-------|-------|-------|-------------------|---------------|
| DYS456    | 15    | 15    | 15    | 15    | 15    | 15                | 15            |
| DYS389 I  | 13    | 13    | 13    | 13    | 13    | 13                | 13            |
| DYS390    | 25    | 25    | 25    | 25    | 25    | 25                | 25            |
| DYS389 II | 31    | 31    | 31    | 31    | 31    | 31                | 31            |
| DYS458    | 16    | 16    | 16    | 16    | 16    | 16                | 16            |
| DYS19     | 16    | 16    | 16    | 16    | 16    | 16                | 16            |
| DYS385    | 11,14 | 11,14 | 11,14 | 11,14 | 11,14 | 11,14             | 11,14         |
| DYS393    | 13    | 13    | 13    | 13    | 13    | 13                | 13            |
| DYS391    | 10    | 10    | 10    | 10    | 10    | 10                | 10            |
| DYS439    | 11    | 11    | 11    | 11    | 11    | 11                | 11            |
| DYS635    | 23    | 23    | 23    | 23    | 23    | 23                | 23            |
| DYS392    | 11    | 11    | 11    | 11    | 11    | 11                | 11            |
| Y_GATA_H4 | 12    | 12    | 12    | 12    | 12    | 12                | 12            |
| DYS437    | 14    | 14    | 14    | 14    | 14    | 14                | 14            |
| DYS438    | 11    | 11    | 11    | 11    | 11    | 11                | 11            |
| DYS448    | 20    | 20    | 20    | 20    | 20    | 20                | 20            |
