# Supplementary material for: Y-chromosomal haplotyping of single sperm cells isolated from semen mixtures – a successful identification of three perpetrators in a multi-suspect sexual assault case
Source: PubMed Central journal article supplement (PMC4228287; doi:10.3325/cmj.2014.55.537), 2014-10
Supplement: CroatMedJ_55_s004.pdf [file CroatMedJ_55_s004.pdf]

Supplementary Table 2. Perpetrator A's Y-STR genotypes.

|           | 1     | 2     | 3     | 4     | 5     | Consensus profile | Known profile |
|-----------|-------|-------|-------|-------|-------|-------------------|---------------|
| DYS456    | 15    | 15    | 15    | -     | 15    | 15                | 15            |
| DYS389 I  | 13    | 13    | 13    | 13    | 13    | 13                | 13            |
| DYS390    | 23    | 23    | 23    | 23    | 23    | 23                | 23            |
| DYS389 II | 29    | 29    | 29    | 29    | 29    | 29                | 29            |
| DYS458    | 17    | 17    | 17    | 17    | 17    | 17                | 17            |
| DYS19     | 15    | 15    | 15    | 15    | 15    | 15                | 15            |
| DYS385    | 14,19 | 14,19 | 14,19 | 14,19 | 14,19 | 14,19             | 14,19         |
| DYS393    | 15    | 15    | -     | 15    | 15    | 15                | 15            |
| DYS391    | 10    | -     | 10    | 10    | 10    | 10                | 10            |
| DYS439    | 10    | 10    | 10    | 10    | 10    | 10                | 10            |
| DYS635    | 21    | 21    | 21    | -     | 21    | 21                | 21            |
| DYS392    | 11    | 11    | 11    | 11    | 11    | 11                | 11            |
| Y_GATA_H4 | 11    | 11    | 11    | 11    | 11    | 11                | 11            |
| DYS437    | 14    | 14    | 14    | 14    | 14    | 14                | 14            |
| DYS438    | -     | -     | 10    | 10    | 10    | 10                | 10            |
| DYS448    | 21    | 21    | 21    | 21    | 21    | 21                | 21            |

Supplementary Table 3. Results of Perpetrator B's Y-STR genotypes.

|           | 1     | 2     | 3  | 4  | 5  | Consensus profile | Known profile |
|-----------|-------|-------|----|----|----|-------------------|---------------|
| DYS456    | -     | 15    | 15 | -  | 15 | 15                | 15            |
| DYS389I   | 12    | 12    | 12 | 12 | 12 | 12                | 12            |
| DYS390    | -     | 23    | 23 | 23 | -  | 23                | 23            |
| DYS389 II | 28    | -     | 28 | 28 | -  | 28                | 28            |
| DYS458    | 17    | 17    | 17 | 17 | 17 | 17                | 17            |
| DYS19     | -     | 15    | 15 | 15 | -  | 15                | 15            |
| DYS385    | 12,18 | 12,18 | 12 | 12 | -  | 12,18             | 12,18         |
| DYS393    | 12    | 12    | 12 | 12 | -  | 12                | 12            |
| DYS391    | 10    | 10    | 10 | 10 | 10 | 10                | 10            |
| DYS439    | 12    | -     | -  | 12 | 12 | 12                | 12            |
| DYS635    | 20    | -     | 20 | -  | 20 | 20                | 20            |
| DYS392    | 12    | 12    | -  | 12 | -  | 12                | 12            |
| Y_GATA_H4 | 12    | 12    | 12 | 12 | 12 | 12                | 12            |
| DYS437    | 15    | 15    | 15 | 15 | 15 | 15                | 15            |
| DYS438    | 10    | -     | 10 | 10 | 10 | 10                | 10            |
| DYS448    | 19    | 19    | 19 | -  | -  | 19                | 19            |

Supplementary Table 4. Results of Perpetrator C's Y-STR genotypes.

|           | 1  | 2  | 3     | 4     | 5  | Consensus profile | Known profile |
|-----------|----|----|-------|-------|----|-------------------|---------------|
| DYS456    | 15 | -  | 15    | -     | 15 | 15                | 15            |
| DYS389 I  | 12 | 12 | 12    | 12    | 12 | 12                | 12            |
| DYS390    | 25 | 25 | 25    | 25    | 25 | 25                | 25            |
| DYS389 II | 28 | -  | 28    | 28    | 28 | 28                | 28            |
| DYS458    | 17 | 17 | 17    | 17    | 17 | 17                | 17            |
| DYS19     | 14 | 14 | 14    | 14    | 13 | 14                | 14            |
| DYS385    | 14 | 14 | 14,21 | 14,21 | -  | -                 | 14,21         |
| DYS393    | 12 | 12 | 12    | 12    | 12 | 12                | 12            |
| DYS391    | 10 | -  | 10    | 10    | 10 | 10                | 10            |
| DYS439    | 12 | 12 | 12    | 12    | -  | 12                | 12            |
| DYS635    | -  | 21 | 21    | 21    | 21 | 21                | 21            |
| DYS392    | 14 | 14 | 14    | 14    | -  | 14                | 14            |
| Y_GATA_H4 | 13 | 13 | 13    | 13    | 13 | 13                | 13            |
| DYS437    | -  | 14 | 14    | 14    | -  | 14                | 14            |
| DYS438    | 11 | -  | 11    | 11    | 11 | 11                | 11            |
| DYS448    | 19 | -  | 19    | 19    | 19 | 19                | 19            |
